# Supplementary material for: Using Microphysiological System for the Development of Treatments for Joint Inflammation and Associated Cartilage Loss—A Pilot Study
Source: MDPI journal article supplement (doi:10.3390/biom13020384), 2023-02-17
Supplement: s1 [file s1]

Table S1: Sequences of primers that were used in this study.

| Gene          | Forward primer (5'->3')  | Reverse primer (5'->3')  |
|---------------|--------------------------|--------------------------|
| <i>RPL13a</i> | GCCATCGTGGCTAAACAGGTA    | GTTGGTGTTTCATCCGCTTGC    |
| <i>COL2</i>   | GGATGGCTGCACGAAACATACCGG | CAAGAAGCAGACCGGCCCTATG   |
| <i>ACAN</i>   | AGTCACACCTGAGCAGCATC     | AGTTCTCAAATTGCATGGGGTGTC |
| <i>MMP-2</i>  | TACAGGATCATTGGCTACACACC  | GGTCACATCGCTCCAGACT      |
| <i>MMP-3</i>  | CGGTTCCGCCTGTCTCAAG      | CGCCAAAAGTGCCTGTCTT      |
| <i>MMP-13</i> | ACTGAGAGGCTCCGAGAAATG    | GAACCCCGCATCTTGGCTT      |
| <i>IL-1B</i>  | ATGATGGCTTATTACAGTGGCAA  | GTCGGAGATTTCGTAGCTGGA    |
| <i>TNF-α</i>  | CCTCTCTCTAATCAGCCCTCT    | GAGGACCTGGGAGTAGATGAG    |
